# Supplementary material for: Assessing the impacts of simulated Ocean Alkalinity Enhancement on viability and growth of near-shore species of phytoplankton
Source: Copernicus journal article supplement (doi:10.5194/egusphere-2024-971), 2024-04-08
Supplement: Supplementary file 1 [file egusphere-2024-971-supplement.pdf]

# Supplementary 1

Table S1: Descriptions of all articles used for digitization in Section 2.

| Primary Author | Year | Species                              | Strain    | Isolation place                        | Isolation Year | Taxonomic Group | Media type | Photoperiod | Irradiance            | Temperature  |
|----------------|------|--------------------------------------|-----------|----------------------------------------|----------------|-----------------|------------|-------------|-----------------------|--------------|
| Hansen, P. J.  | 2002 | <i>Ceratium lineatum</i>             | N/A       | Øresund, Denmark                       | 1995           | Dinoflagellate  |            |             |                       |              |
|                |      | <i>Heterocapsa triquetra</i>         | K-0481    | Øresund, Denmark                       | 1988           | Dinoflagellate  | f/2        | 16h:8h      | 60 $\mu$ mol photons  | 15 $\pm$ 1°C |
|                |      | <i>Prorocentrum minimum</i>          | K-0295    | Kattegat, Denmark                      | 1989           | Dinoflagellate  |            |             |                       |              |
| Lundholm, N.   | 2004 | <i>Pseudo-nitzschia pungens</i>      | CL-193    | Deadmans Harbour, Bay of Fundy, Canada | 2002           | Diatom          |            |             |                       |              |
|                |      | <i>Pseudo-nitzschia multiseriata</i> | CL-195    | Deadmans Harbour, Bay of Fundy, Canada | 2002           | Diatom          |            |             |                       |              |
|                |      | <i>Pseudo-nitzschia multiseriata</i> | OKPm013-2 | Okkiray Bay, Iwate Prefecture, Japan   | 2001           | Diatom          | L1         | 16h:8h      | 100 $\mu$ mol photons | 15 $\pm$ 1°C |
|                |      | <i>Nitzschia navis-varingica</i>     | VHL987    | Ha Long Bay, Vietnam                   | 1998           | Diatom          |            |             |                       |              |
|                |      | <i>Pseudo-nitzschia australis</i>    | PS11V     | Baiona, Ría Vigo, Spain                | 2001           | Diatom          |            |             |                       |              |
|                |      | <i>Pseudo-nitzschia sp.</i>          | NWFSC095  | Sequim Bay, Washington, USA            | 2002           | Diatom          |            |             |                       |              |

| Primary Author | Year | Species                               | Strain | Isolation place                         | Isolation Year | Taxonomic Group | Media type | Photoperiod | Irradiance            | Temperature  |
|----------------|------|---------------------------------------|--------|-----------------------------------------|----------------|-----------------|------------|-------------|-----------------------|--------------|
| Lundholm, N.   | 2004 | <i>Pseudo-nitzschia calliantha</i>    | CL-190 | Baie-Sainte-Anne, New Brunswick, Canada | 2002           | Diatom          |            |             |                       |              |
|                |      | <i>Pseudo-nitzschia delicatissima</i> | Tasm10 | Hobart Harbour, Tasmania                | 2000           | Diatom          |            |             | 100 $\mu$ mol photons | 15 $\pm$ 1°C |
|                |      | <i>Pseudo-nitzschia fraudulenta</i>   | CL-192 | Deadmans Harbour, Bay of Fundy, Canada  | 2002           | Diatom          | L1         | 16h:8h      |                       |              |
|                |      | <i>Pseudo-nitzschia granii</i>        | PG     | Ocean Station Papa, NE Pacific          | 2000           | Diatom          |            |             |                       |              |
|                |      | <i>Pseudo-nitzschia seriata</i>       | CL-150 | Tracadie Harbour, PEI, Canada           | 2002           | Diatom          |            |             | 55 $\mu$ mol photons  | 4°C          |
|                |      | <i>Pseudo-nitzschia cf. turgidula</i> | PT     | Ocean Station Papa, NE Pacific          | 2002           | Diatom          |            |             | 100 $\mu$ mol photons | 15 $\pm$ 1°C |
| Hansen, P. J.  | 2007 | <i>Ceratium lineatum</i>              | N/A    | Øresund, Denmark                        | 1995           | Dinoflagellate  |            |             |                       |              |
|                |      | <i>Heterocapsa triquetra</i>          | K-0481 | Øresund, Denmark                        | 1988           | Dinoflagellate  | f/2        | 16h:8h      | 60 $\mu$ mol photons  | 15 $\pm$ 1°C |
|                |      | <i>Prorocentrum minimum</i>           | K-0295 | Kattegat, Denmark                       | 1989           | Dinoflagellate  |            |             |                       |              |
| Schmidt, L. E. | 2001 | <i>Chrysochromulina polylepis</i>     | K-0259 | Øresund, Denmark                        | 1988           | Prymnesiophyte  | f/2        | 16h:8h      | 60 $\mu$ mol photons  | 15 $\pm$ 1°C |
|                |      | <i>Chrysochromulina simplex</i>       | K-0272 | Victoria, Australia                     | 1988           | Prymnesiophyte  |            |             |                       |              |

| Primary Author           | Year   | Species                          | Strain  | Isolation place    | Isolation Year | Taxonomic Group | Media type                               | Photoperiod | Irradiance                       | Temperature |
|--------------------------|--------|----------------------------------|---------|--------------------|----------------|-----------------|------------------------------------------|-------------|----------------------------------|-------------|
| Møgelhøj, M. K.          | 2006   | <i>Rhodomonas marina</i>         | K-0435  | Kattegat, Denmark  | 1990           | Cryptophyte     | B1 modified using 0.5 mL vitamin stock/L | 16h:8h      | 65 µmol photons                  | 15 ±2°C     |
|                          |        | <i>Rhodomonas salina</i>         | K-0294  | Øresund, Denmark   | 1989           | Cryptophyte     |                                          |             |                                  |             |
|                          |        | <i>Heterocapsa triquetra</i>     | K-0481  | Øresund, Denmark   | 1988           | Dinoflagellate  |                                          |             |                                  |             |
|                          |        | <i>Prorocentrum micans</i>       | K-0335  | Kattegat, Denmark  | 1989           | Dinoflagellate  |                                          |             |                                  |             |
|                          |        | <i>Prorocentrum minimum</i>      | K-0295  | Kattegat, Denmark  | 1989           | Dinoflagellate  |                                          |             |                                  |             |
|                          |        | <i>Phaeodactylum tricorutum</i>  | N/A     | Unknown            | Unknown        | Diatom          |                                          |             |                                  |             |
| Nielsen, L. T.           | 2007   | <i>Heterocapsa triquetra</i>     | N/A     | Unknown            | Unknown        | Dinoflagellate  | f/2 w/ 3x Si                             | 16h:8h      | 20, 35, 80, and 250 µmol photons | 16.5 ±0.5°C |
|                          |        | <i>Nitzschia navis-varingica</i> | VHL985  | Unknown            | Unknown        | Diatom          |                                          |             |                                  |             |
| Berge, T                 | 2010   | <i>Prorocentrum minimum</i>      | K-1138  | Skagerrak          | 2008           | Dinoflagellate  | f/2                                      | 14h:10h     | 150 µmol photons                 | 15°C        |
|                          |        | <i>Prorocentrum micans</i>       | K-1137  | Skagerrak          | 2008           | Dinoflagellate  |                                          |             |                                  |             |
|                          |        | <i>Karlodinium veneficum</i>     | K-1413  | North Sea          | 2007           | Dinoflagellate  |                                          |             |                                  |             |
|                          |        | <i>Heterocapsa triquetra</i>     | K-1133  | Baltic             | 2007           | Dinoflagellate  |                                          |             |                                  |             |
|                          |        | <i>Rhodomonas marina</i>         | K-0435  | Kattegat, Denmark  | 1990           | Cryptophyte     |                                          |             |                                  |             |
|                          |        | <i>Teleaulax amphioxeia</i>      | N/A     | The Sound, Denmark | 2009           | Cryptophyte     |                                          |             |                                  |             |
|                          |        | <i>Coscinodiscus granii</i>      | K-1048  | USA                | 1994           | Diatom          |                                          |             |                                  |             |
| <i>Prymnesium parvum</i> | K-0623 | Unknown                          | Unknown | Prymnesiophyte     |                |                 |                                          |             |                                  |             |

| Primary Author | Year | Species                      | Strain      | Isolation place         | Isolation Year | Taxonomic Group | Media type | Photoperiod | Irradiance            | Temperature |
|----------------|------|------------------------------|-------------|-------------------------|----------------|-----------------|------------|-------------|-----------------------|-------------|
| Berge, T       | 2012 | <i>Heterocapsa triquetra</i> | A4c, NA     | Copenhagen, Denmark     | 2007           | Dinoflagellate  | L1         | 16h:8h      | 150 $\mu$ mol photons | 15°C        |
|                |      | <i>Heterocapsa triquetra</i> | A5c, K-1134 | Copenhagen, Denmark     | 2007           | Dinoflagellate  |            |             |                       |             |
|                |      | <i>Heterocapsa triquetra</i> | A2b, K-1131 | Copenhagen, Denmark     | 2007           | Dinoflagellate  |            |             |                       |             |
|                |      | <i>Heterocapsa triquetra</i> | A4a, Na     | Copenhagen, Denmark     | 2007           | Dinoflagellate  |            |             |                       |             |
|                |      | <i>Heterocapsa triquetra</i> | F2e, NA     | Gedser Harbour, Denmark | 2007           | Dinoflagellate  |            |             |                       |             |
|                |      | <i>Heterocapsa triquetra</i> | F1f, NA     | Gedser Harbour, Denmark | 2007           | Dinoflagellate  |            |             |                       |             |
|                |      | <i>Heterocapsa triquetra</i> | F1c, K-1125 | Gedser Harbour, Denmark | 2007           | Dinoflagellate  |            |             |                       |             |
|                |      | <i>Heterocapsa triquetra</i> | F1a, K-1124 | Gedser Harbour, Denmark | 2007           | Dinoflagellate  |            |             |                       |             |
|                |      | <i>Heterocapsa triquetra</i> | 2-1, K-1127 | Stege Harbour, Denmark  | 2007           | Dinoflagellate  |            |             |                       |             |
|                |      | <i>Heterocapsa triquetra</i> | 2-3, NA     | Stege Harbour, Denmark  | 2007           | Dinoflagellate  |            |             |                       |             |
|                |      | <i>Heterocapsa triquetra</i> | 2-5, NA     | Stege Harbour, Denmark  | 2007           | Dinoflagellate  |            |             |                       |             |
|                |      | <i>Heterocapsa triquetra</i> | 2-6, NA     | Stege Harbour, Denmark  | 2007           | Dinoflagellate  |            |             |                       |             |
|                |      | <i>Heterocapsa triquetra</i> | HTMS0402    | Masan Bay Korea         | 2004           | Dinoflagellate  |            |             |                       |             |

| Primary Author   | Year | Species                      | Strain       | Isolation place          | Isolation Year | Taxonomic Group | Media type | Photoperiod | Irradiance                                        | Temperature  |
|------------------|------|------------------------------|--------------|--------------------------|----------------|-----------------|------------|-------------|---------------------------------------------------|--------------|
| Berge, T         | 2012 | <i>Heterocapsa triquetra</i> | KAC 26       | Kalmarsund, Sweden       | 2000           | Dinoflagellate  |            |             |                                                   |              |
|                  |      | <i>Heterocapsa triquetra</i> | KAC 27       | Kalmarsund, Sweden       | 2000           | Dinoflagellate  |            |             |                                                   |              |
|                  |      | <i>Heterocapsa triquetra</i> | NC 98        | West Coast, Norway       | 1998           | Dinoflagellate  |            |             |                                                   |              |
|                  |      | <i>Heterocapsa triquetra</i> | K-0482       | Kattegat, Denmark        | 1988           | Dinoflagellate  |            |             |                                                   |              |
|                  |      | <i>Heterocapsa triquetra</i> | KAC 49       | West Coast, Sweden       | 1986           | Dinoflagellate  |            |             |                                                   |              |
|                  |      | <i>Heterocapsa triquetra</i> | K-0447       | The Sound, Denmark       | 1984           | Dinoflagellate  | L1         | 16h:8h      | 150 $\mu$ mol photons                             | 15°C         |
|                  |      | <i>Heterocapsa triquetra</i> | NIES 235     | Osaka Bay, Japan         | 1982           | Dinoflagellate  |            |             |                                                   |              |
|                  |      | <i>Heterocapsa triquetra</i> | NIES 7       | Farima-Nada, Japan       | 1981           | Dinoflagellate  |            |             |                                                   |              |
|                  |      | <i>Heterocapsa triquetra</i> | CCMP 449     | Lawrence Estuary, Canada | 1960           | Dinoflagellate  |            |             |                                                   |              |
|                  |      | <i>Heterocapsa triquetra</i> | PLY 169      | Tamar Estuary, England   | 1957           | Dinoflagellate  |            |             |                                                   |              |
| Søgaard, D. H.   | 2011 | <i>Fragilariopsis</i> sp.    | CCMP 2297    | Baffin Bay               | 1998           | Diatom          |            |             |                                                   |              |
|                  |      | <i>Chlamydomonas</i> sp.     | CCMP 2294    | Baffin Bay               | 2003           | Chlorophyte     | L1         | 16h:8h      | 50 $\mu$ mol photons                              | 3 $\pm$ 2°C  |
|                  |      | <i>Fragilariopsis nana</i>   | SCCAP K-0637 | Labrador Sea             | Unknown        | Diatom          |            |             |                                                   |              |
| Søderberg, L. M. | 2007 | <i>Ceratium fusus</i>        | N/A          | The Sound, Denmark       | 2003           | Dinoflagellate  |            |             |                                                   |              |
|                  |      | <i>Ceratium furca</i>        | N/A          | The Sound, Denmark       | 2003           | Dinoflagellate  | f/2        | 16h:8h      | 100 $\mu$ mol photons; 25 & 200 $\mu$ mol photons | 15 $\pm$ 1°C |
|                  |      | <i>Ceratium tripos</i>       | N/A          | The Sound, Denmark       | 1998           | Dinoflagellate  |            |             |                                                   |              |

| <b>Primary Author</b> | <b>Year</b> | <b>Species</b>            | <b>Strain</b> | <b>Isolation place</b> | <b>Isolation Year</b> | <b>Taxonomic Group</b> | <b>Media type</b> | <b>Photoperiod</b> | <b>Irradiance</b>             | <b>Temperature</b> |
|-----------------------|-------------|---------------------------|---------------|------------------------|-----------------------|------------------------|-------------------|--------------------|-------------------------------|--------------------|
| Weisse, T.            | 2006        | <i>Cryptomonas sp.</i>    | SAG 26.80     | Unknown                | Unknown               | Cryptophyte            | MWC               | 14h:10h            | 10-30 $\mu\text{mol photons}$ | 15 $\pm$ 0.2°C     |
| Liu, W.               | 2007        | <i>Chattonella marina</i> | NIES-3        | Osaka Bay, Japan       | 1982                  | Raphidophyte           | K                 | 12h:12h            | c. 42 $\mu\text{mol photons}$ | 22-24°C            |

## Supplementary 2

### Comparison of Aerated and pH-drift Cultures of *Thalassiosira pseudonana* CCMP1335

5 Cultures of the diatom *Thalassiosira pseudonana* (Clone CCMP 1335) in 40-ml glass tubes were maintained in balanced growth (i.e., in semicontinuous culture) in *f/2* medium at 18 °C and under continuous illumination of 190  $\mu\text{mol photons m}^{-2} \text{s}^{-1}$ , provided by cool-white fluorescent bulbs (see Section 4.1 for more details). The cultures were used to inoculate 2-L volumes of *f/2* medium (Guillard, 1973). One was sealed (pH-drift); the second (aerated) was bubbled with air that had been passed through an activated charcoal filter (MacIntyre and Cullen, 2005). Both were stirred with Teflon-coated magnetic stir bars.

10 The two cultures were subsampled daily for analysis of DIC, pH, cell counts, and *in vivo* fluorescence. The DIC and pH were used to estimate the concentrations of CO<sub>2</sub>, bicarbonate, and carbonate, using CO2SYS (Lewis and Wallace, 1998). Cell counts were performed with an Accuri C6 flow cytometer (BD, Franklin Lakes, NJ, USA), as described by MacIntyre et al. (2018). Fluorescence was measured with a FRe fluorometer (Satlantic, Halifax, NS, Canada), using fits of the induction curve to estimate the quantum yield of PSII electron transport ( $F_v/F_m$ ) and the photosynthetic cross section ( $\sigma$ ). See Section 4.1 for more details.

15 In both cultures, there was a rapid increase in particles with chlorophyll *a* autofluorescence in the first 48 hours of the experiment (Figure S1 a, b). Thereafter, the concentration of particles decreased but their size, as inferred from the median side-scatter, increased (Figure S1 a, b). Both the initial peak in concentration and the subsequent rise in side scatter were more pronounced in the aerated culture. The most parsimonious explanation for this is that the cells aggregated in stationary phase. A biomass proxy (Figure S1 a, b) was calculated as the product of the two terms. This  
20 demonstrated the expected biomass response of exponential growth followed by stability in early stationary phase.

The changes in the biomass proxy were coincident with a draw-down in CO<sub>2</sub> and bicarbonate and a rise in carbonate (Figure S1 c, d). The drawdown was persistent in the pH-drift (sealed) culture but was reversed in the aerated culture after active biomass accumulation ceased. The lower pH in the latter favoured bicarbonate over carbonate, while carbonate dominated in the sealed culture.

25

There was a decline in photosynthetic efficiency ( $F_v/F_m$ ) in both cultures, which was more pronounced in the pH-drift culture (Figure S1 e, f). In contrast, there was relatively little variation in the photosynthetic cross-section ( $\sigma$ ) in either.

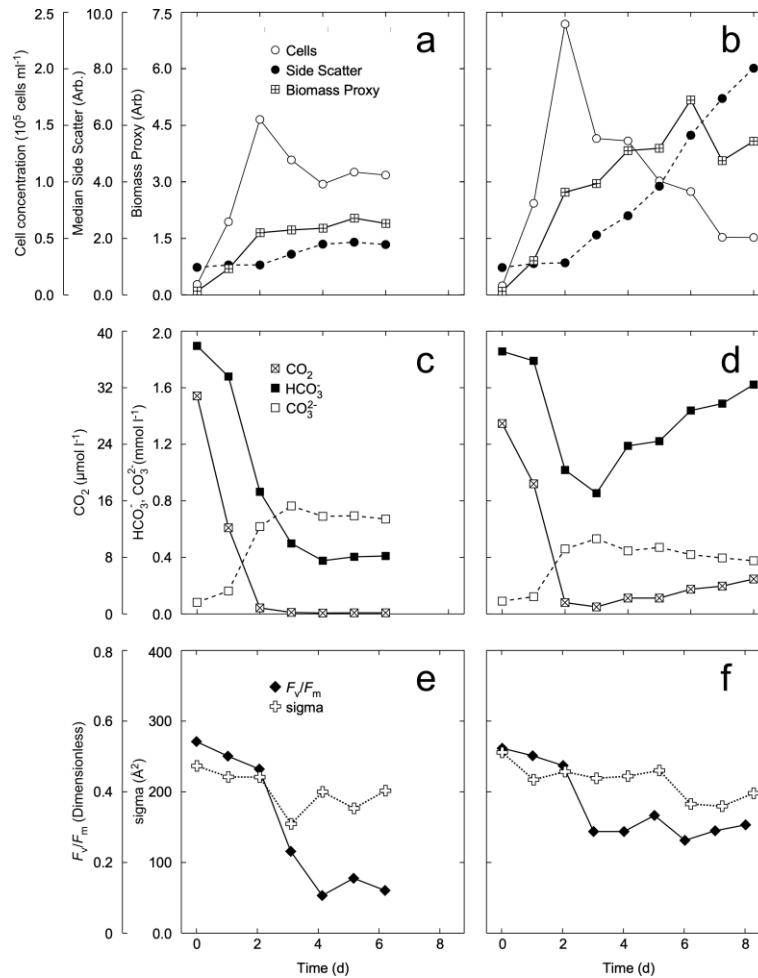

Figure S1: Time courses of biomass parameters (a, b), dissolved inorganic carbon (c, d), and photosynthetic response variables (e, f) in sealed (a, c, e) and aerated (b, d, f) cultures of *Thalassiosira pseudonana*.



Guillard, R. R. L.: Culture of phytoplankton for feeding marine invertebrates, In: Smith WL, Chanley MH (eds) Culture of marine invertebrate animals. Plenum Publishing Co., New York, 108-132, 1975.

Lewis, E., and Wallace, D.: Program developed for CO<sub>2</sub> system calculations, Carbon Dioxide Information Analysis Center, managed by Lockheed Martin Energy Research Corporation for the US Department of Energy Tennessee, 1998.

35 MacIntyre, H. L., Cullen, J. J.: Using cultures to investigate the physiological ecology of microalgae, In: Andersen RA (ed) Algal Culture Techniques. Academic Press, New York, 287-326, 2005.

MacIntyre, H. L., Cullen, J. J., Whitsitt, T. J., Petri, B.: Enumerating viable phytoplankton using a culture-based Most Probable Number assay following ultraviolet-C treatment, J. Appl. Phycol., 30, 1073-1094. doi:10.1007/s10811-017-1254-8, 2018.
